# Supplementary material for: An assessment of the impacts of child oral health in Indonesia and associations with self-esteem, school performance and perceived employability
Source: PubMed Central journal article supplement (PMC5361816; doi:10.1186/s12903-017-0358-5), 2017-03-21
Supplement: 12903_2017_358_MOESM3_ESM.pdf [file 12903_2017_358_MOESM3_ESM.pdf]

Child ID Number: .....

**Additional file 3**

**Self Esteem Measure for 6-7 year olds**

**Instruction to Teacher:** Please read the statements with the child. Help the child to complete if needed. But answers are to be from the child. Make it a fun game.

.....

Put a cross on the line to the closest to how you feel.

I like myself

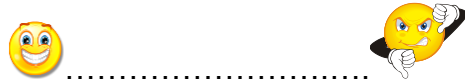

I feel there are many good things  
about me.

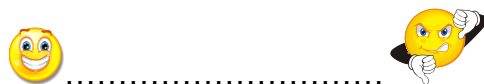

I feel proud of myself.

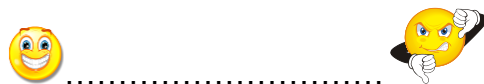

I feel confident.

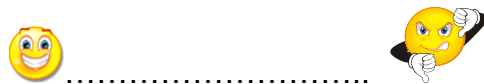

I like the way I am.

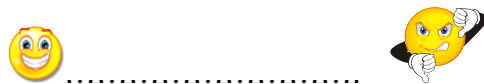

**Child ID Number:** .....

**Self Esteem Measure for 10-11 year olds**

(With sub scales of peer and school connectedness)

There are no right or wrong answers, please choose the answer you think is the closest to how you feel.

**SD** = strongly disagree, **D** = disagree, **A** = agree, **SA** = strongly agree

|                                                     |    |   |   |    |
|-----------------------------------------------------|----|---|---|----|
| I like myself.                                      | SD | D | A | SA |
| I feel there are many good things about me.         | SD | D | A | SA |
| I feel proud of myself.                             | SD | D | A | SA |
| I feel confident.                                   | SD | D | A | SA |
| I like the way I am                                 | SD | D | A | SA |
|                                                     |    |   |   |    |
| I have as many friends as others my age.            | SD | D | A | SA |
| I am as popular as others my age.                   | SD | D | A | SA |
| Other people my age think I am fun to be with.      | SD | D | A | SA |
| Other people my age wish they were like me.         | SD | D | A | SA |
| I am a person others turn to for help.              | SD | D | A | SA |
|                                                     |    |   |   |    |
| My teachers are fair with what they expect from me. | SD | D | A | SA |
| I am usually proud of my report card.               | SD | D | A | SA |
| School is as hard for me as it is for most others.  | SD | D | A | SA |
|                                                     |    |   |   |    |
| My teachers are happy with the kind of work I do.   | SD | D | A | SA |
| Most of my teachers understand me.                  | SD | D | A | SA |
